# Supplementary material for: Synthesis and Pharmacological Evaluation of Enantiopure N-Substituted Ortho-c Oxide-Bridged 5-Phenylmorphans
Source: MDPI journal article supplement (doi:10.3390/molecules27248808), 2022-12-12
Supplement: s1 [file s1]

## SUPPLEMENTARY MATERIALS

Fuying Li<sup>1</sup>, Theresa A. Kopajtic<sup>2</sup>, Jonathan L. Katz<sup>2</sup>, Dan Luo<sup>3</sup>, Thomas E. Prisinzano<sup>3</sup>,  
Gregory H. Imler<sup>4</sup>, Jeffrey R. Deschamps<sup>4</sup>, Arthur E. Jacobson<sup>1,\*</sup>, Kenner C. Rice<sup>1,\*</sup>

<sup>1</sup>Drug Design and Synthesis Section, Molecular Targets and Medications Discovery  
Branch, National Institute on Drug Abuse and the National Institute on Alcohol Abuse  
and Alcoholism, National Institutes of Health, Department of Health and Human  
Services, 5625 Fishers, Rockville, MD 20852, USA

<sup>2</sup>Psychobiology Section, Molecular Neuropsychiatry Research Branch, Intramural  
Research Program, National Institute on Drug Abuse, National Institutes of Health,  
Baltimore, MD 21224, USA

<sup>3</sup>Department of Pharmaceutical Sciences, College of Pharmacy, University of Kentucky,  
789 S. Limestone Street, Lexington, Kentucky 40536, USA

<sup>4</sup>Center for Biomolecular Science and Engineering, Naval Research Laboratory,  
Washington DC 20375, USA

\*Correspondence: kennerr@nida.nih.gov; Tel.: 301-451-4799, arthurj@nida.nih.gov;  
Tel.: 301-451-5028

## Table of Contents

|                                                                                     |         |
|-------------------------------------------------------------------------------------|---------|
| 1) $^1\text{H}$ (top of page) & $^{13}\text{C}$ NMR (bottom of page)                | 3 - 17  |
| 2) Table S1 – S7. Crystal data, atomic coordinates, etc, for compound (-)- <b>6</b> | 18 - 26 |

# Compound 5

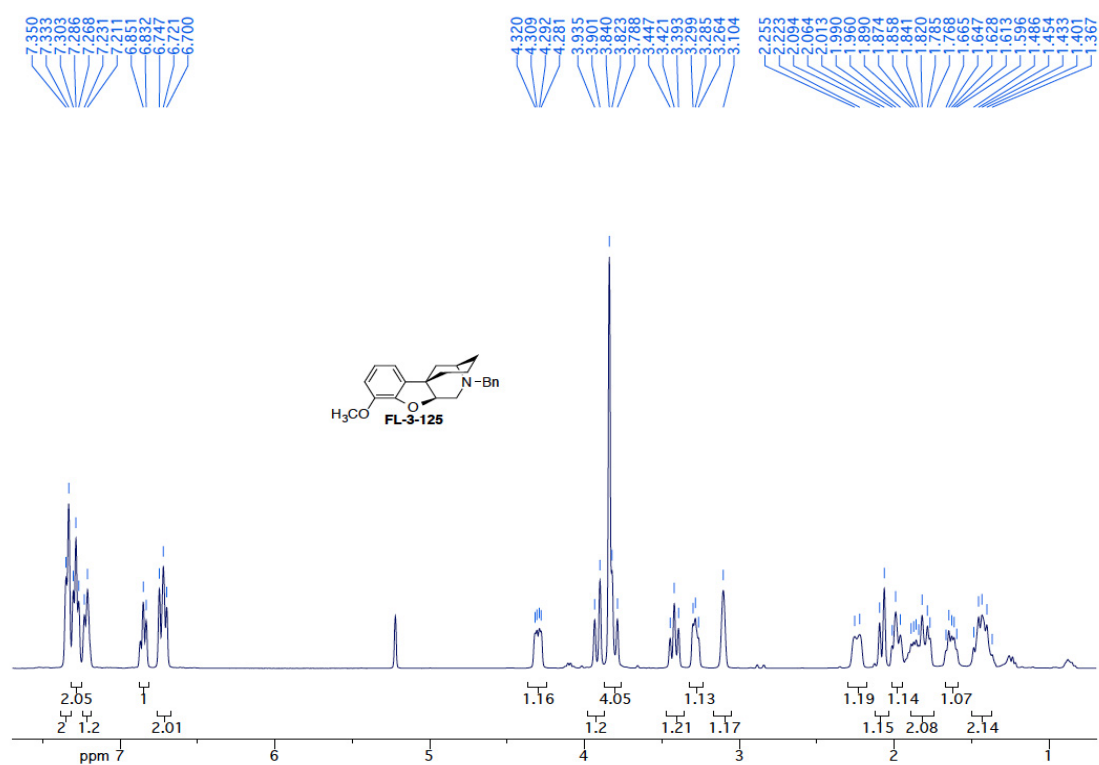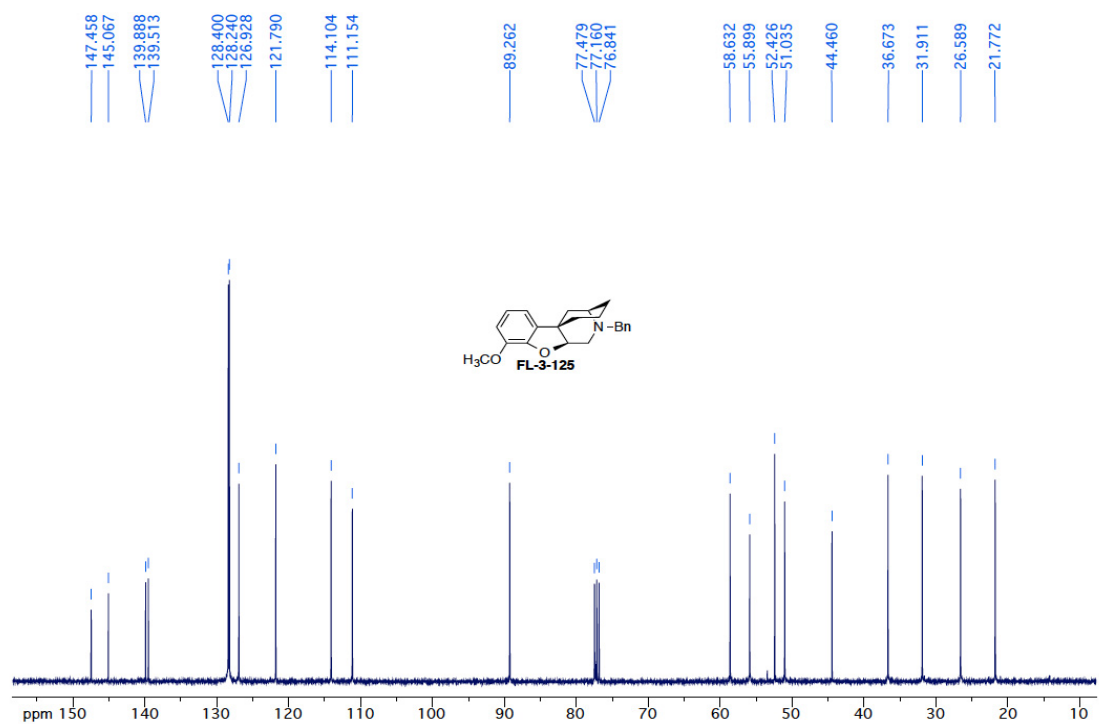

# Compound 6

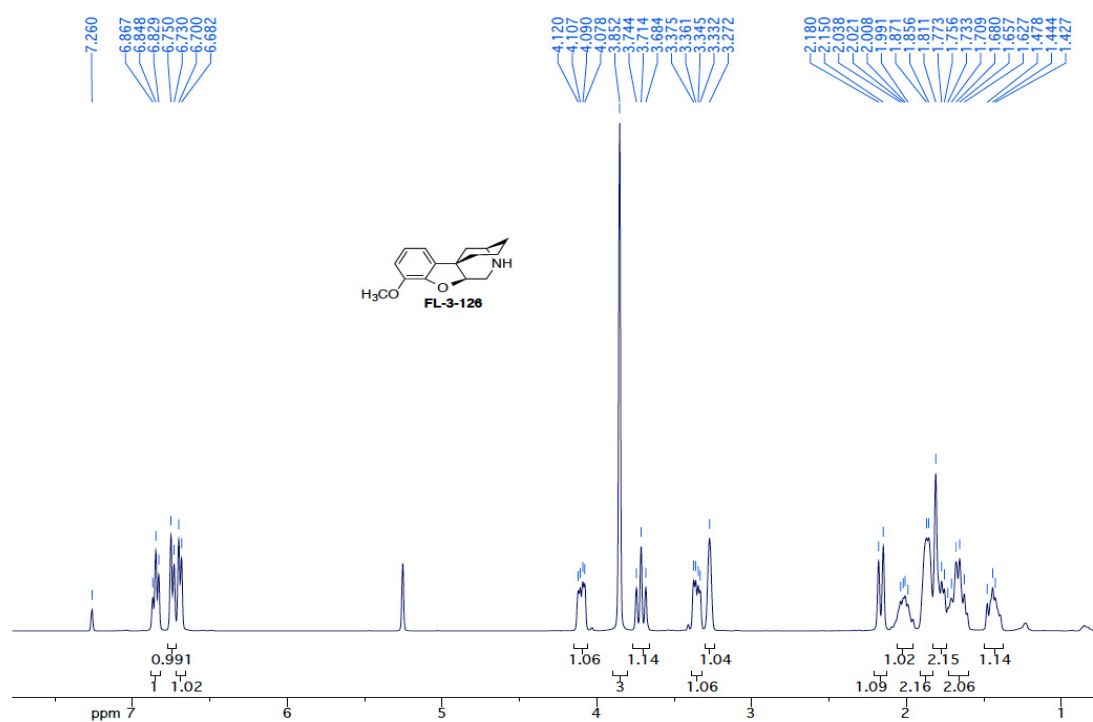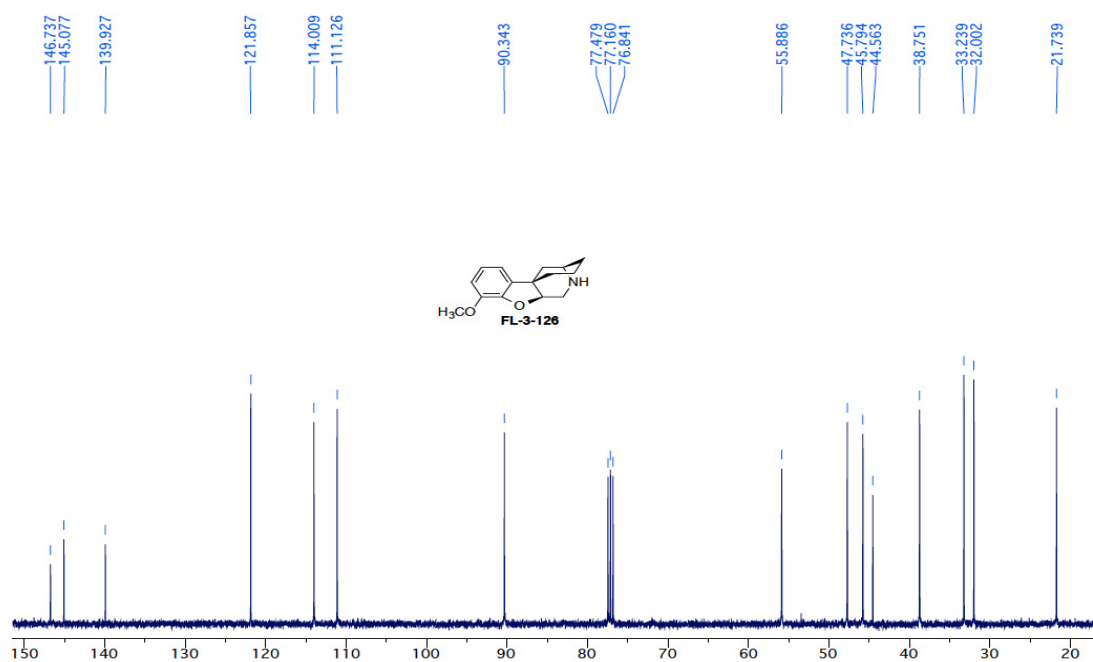

# Compound 7

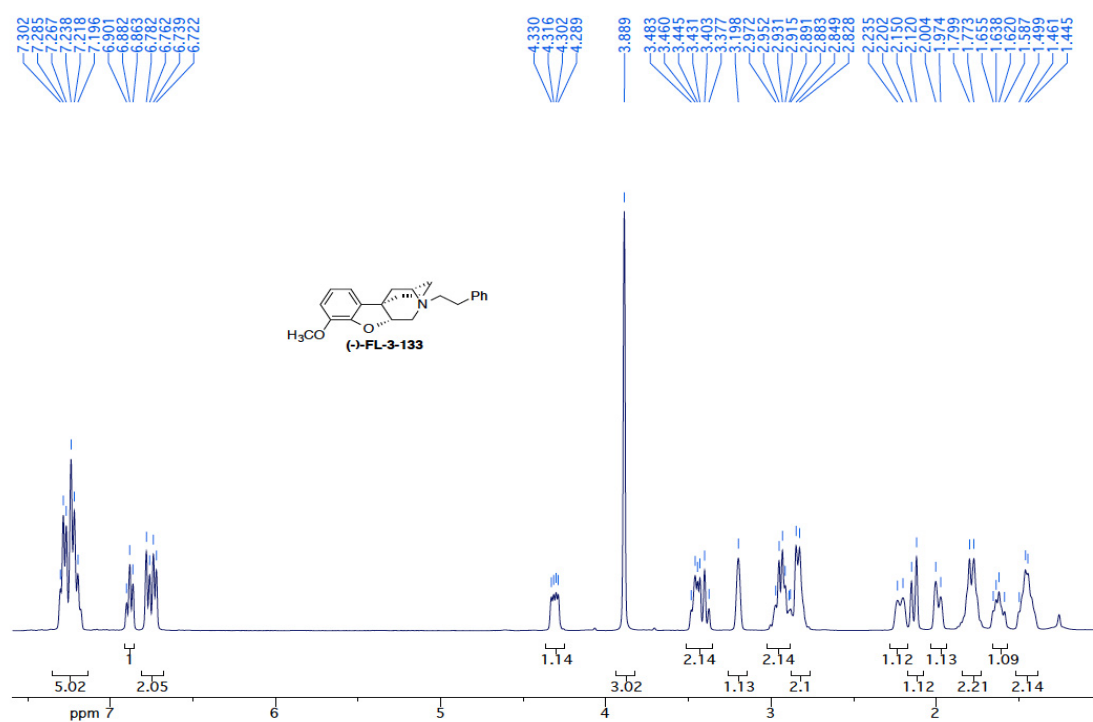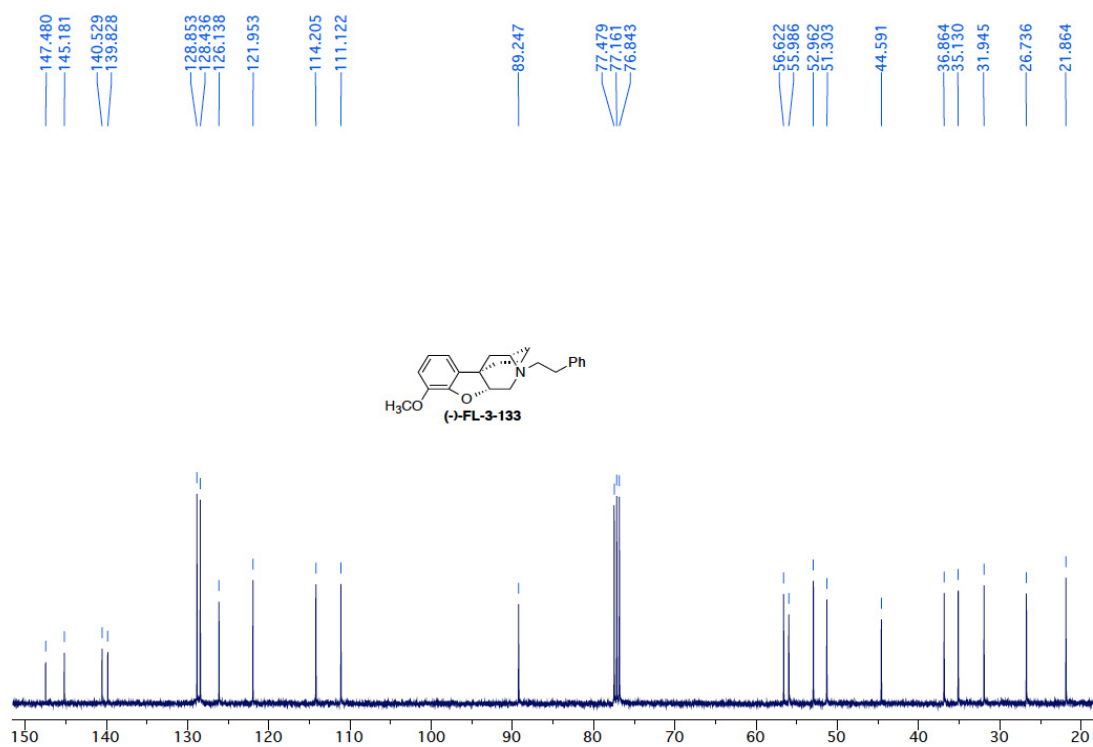

# Compound (+)-8

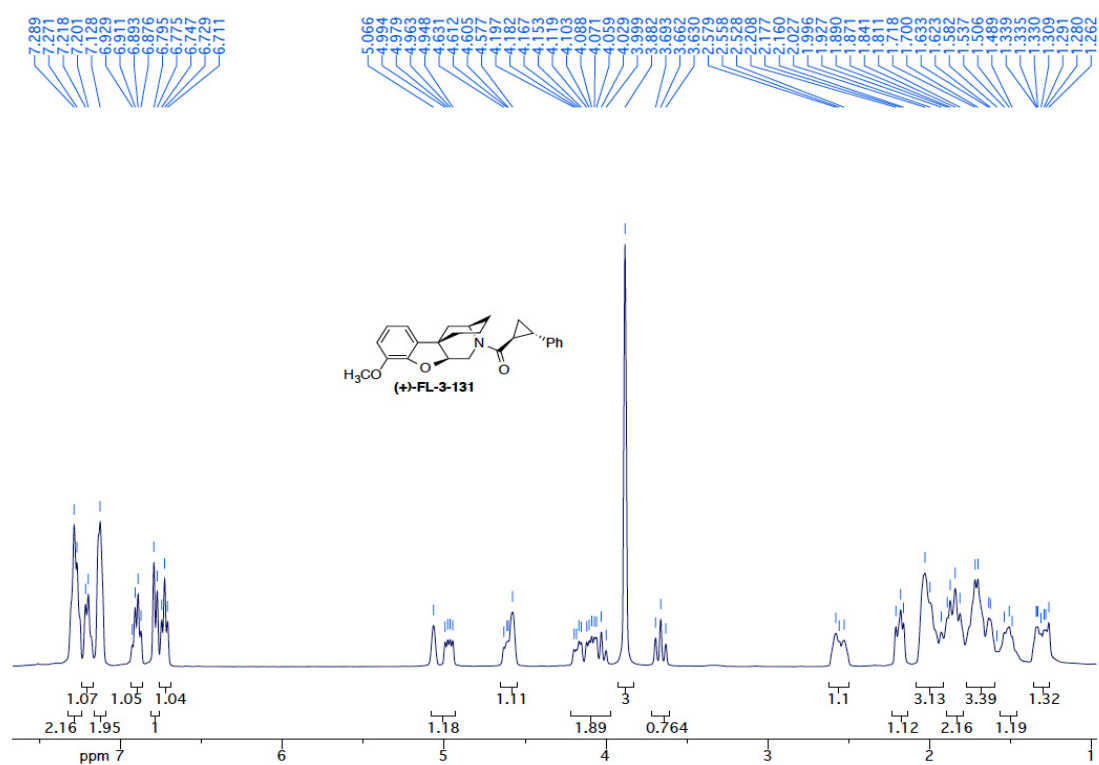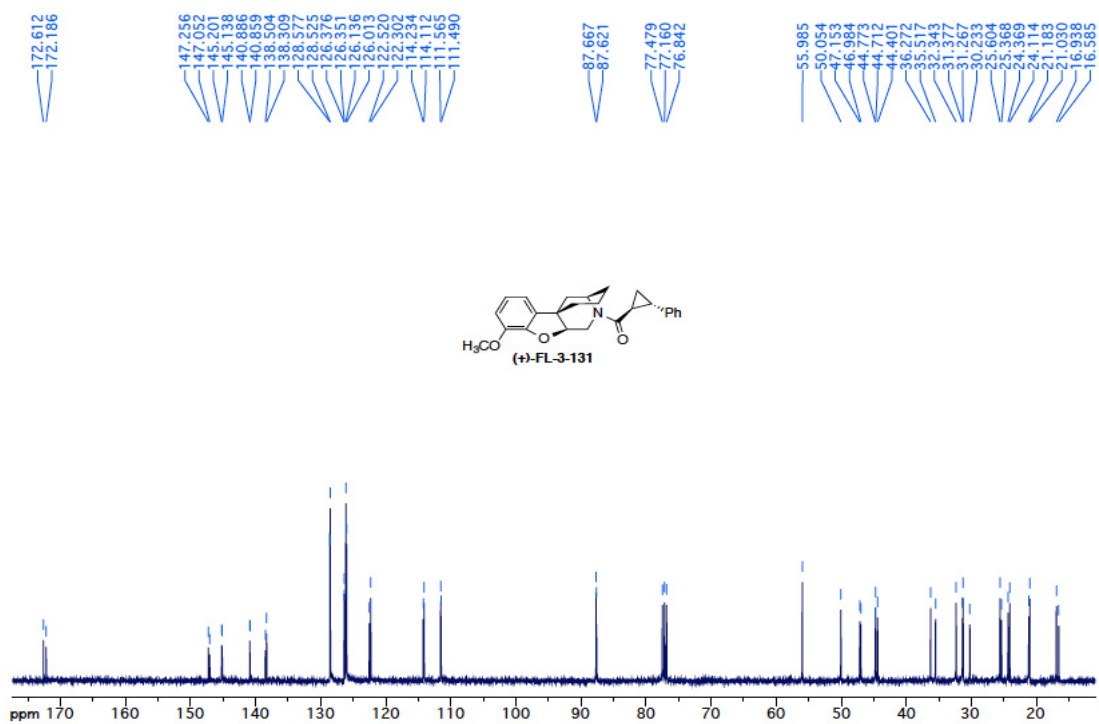

# Compound (-)-8

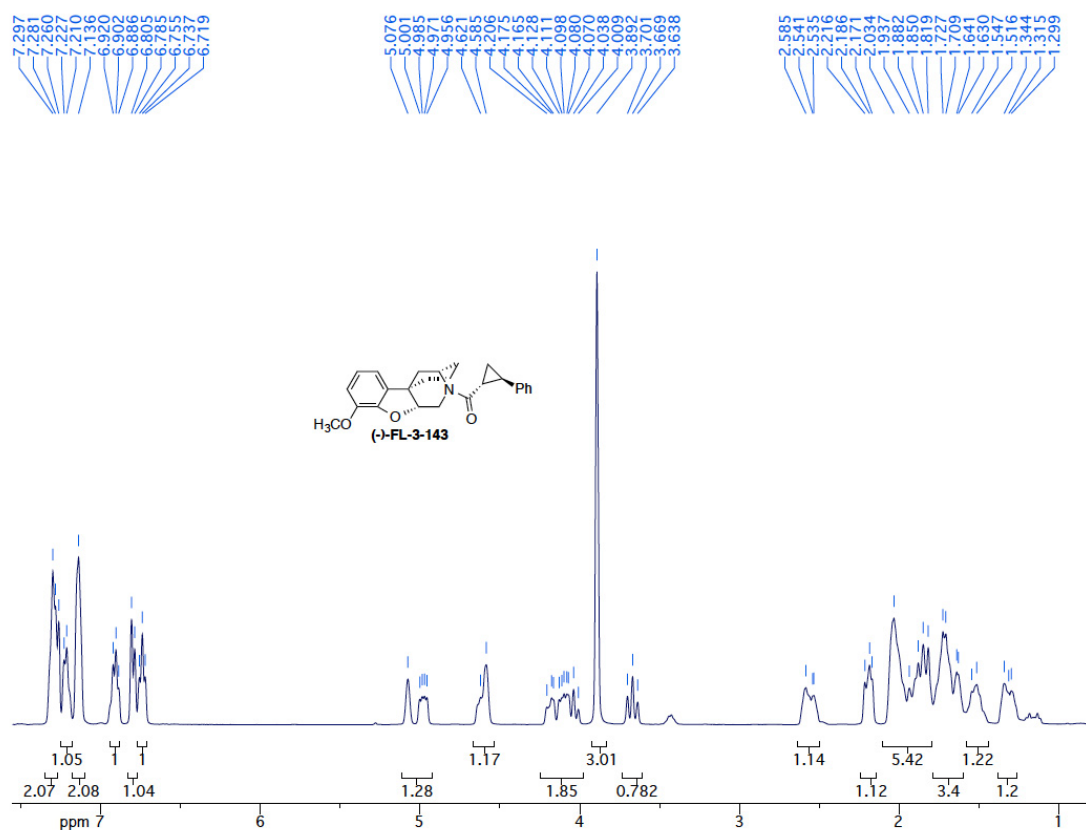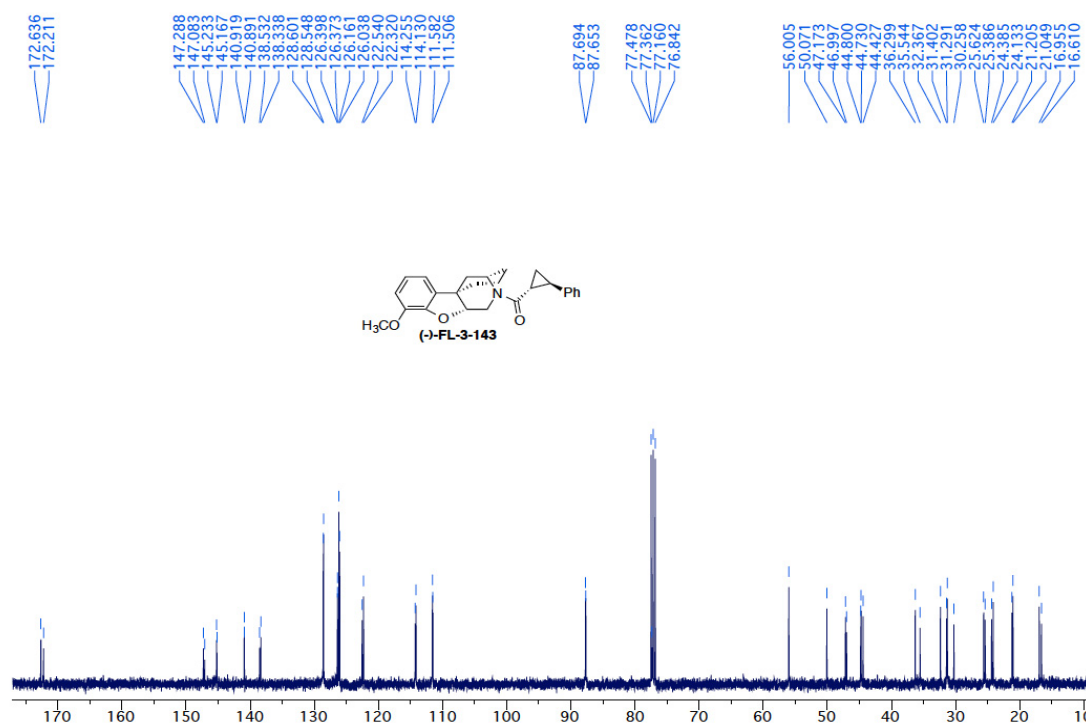

# Compound (+)-9

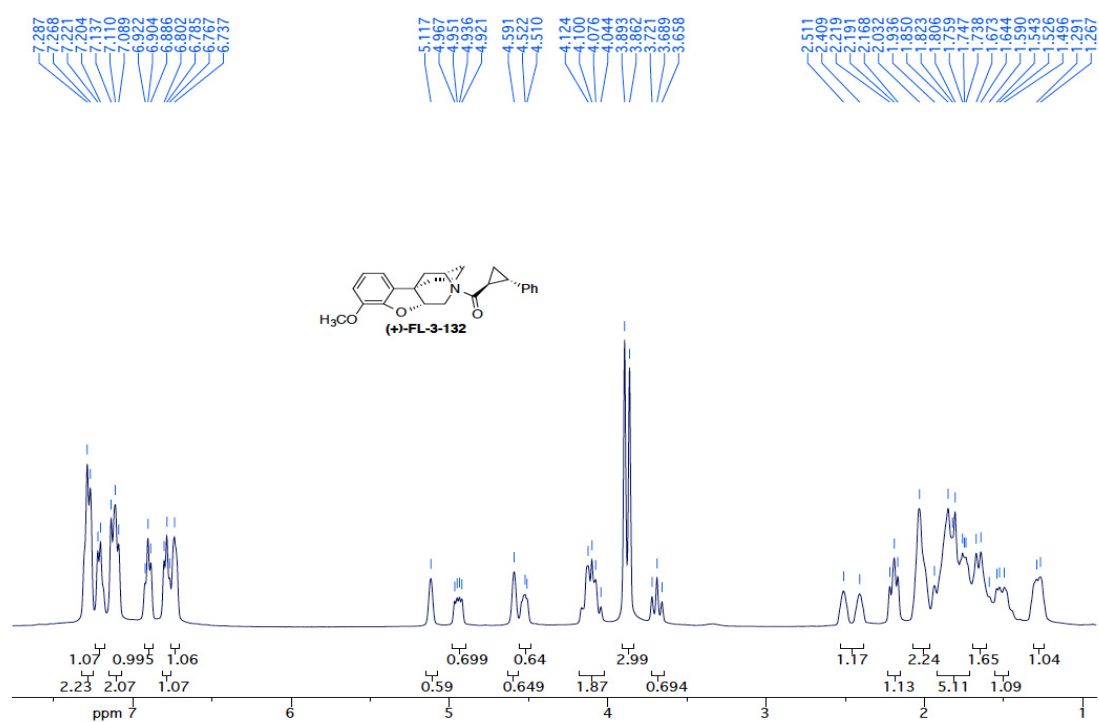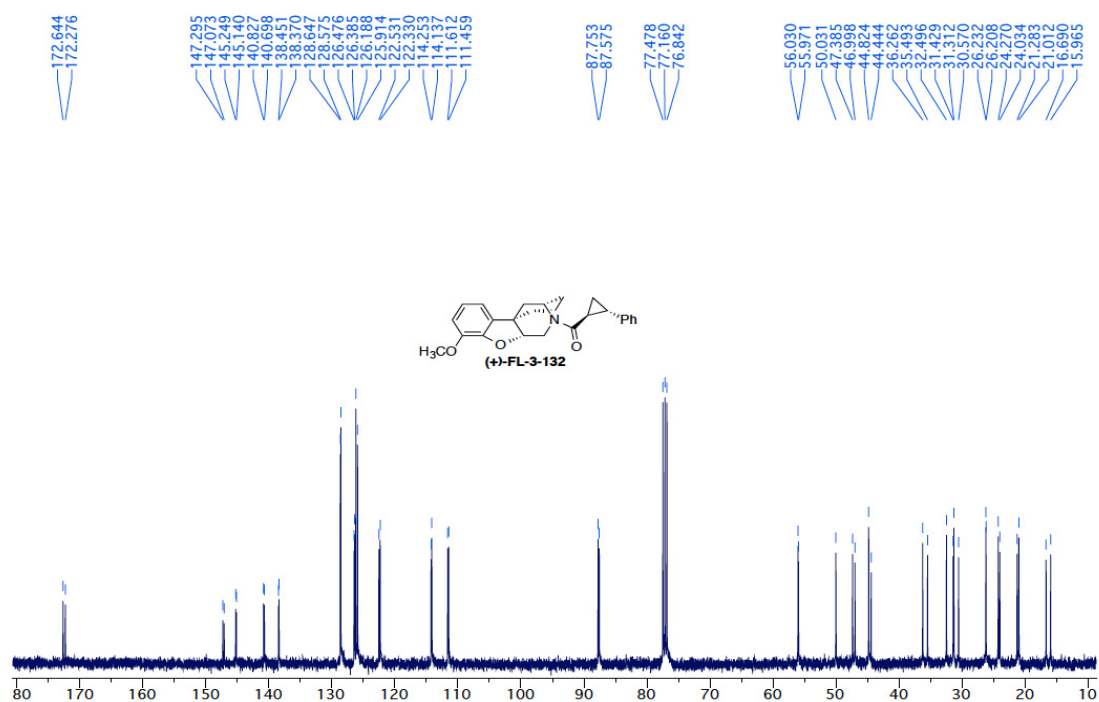



# Compound (-)-9

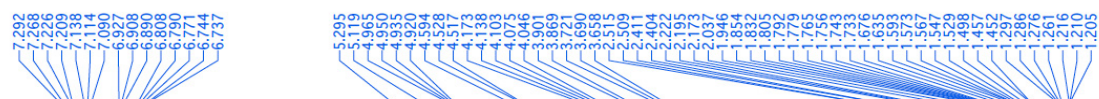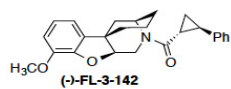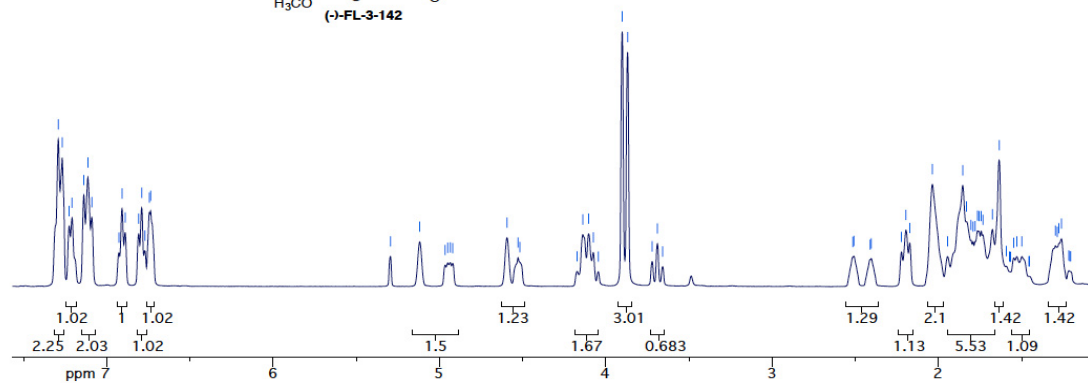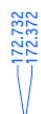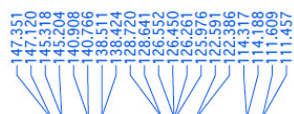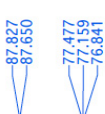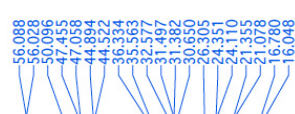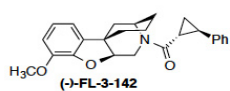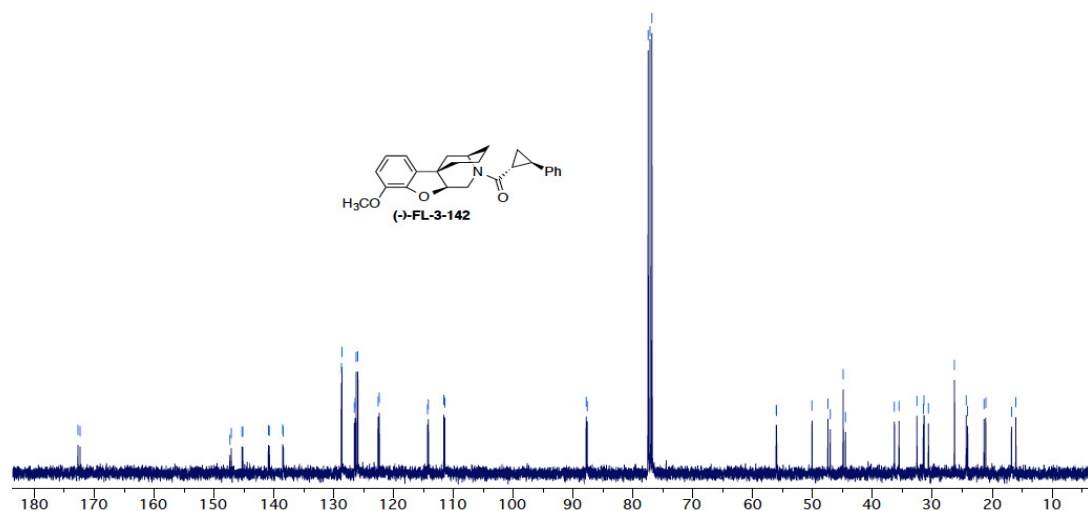

# Compound (+)-12

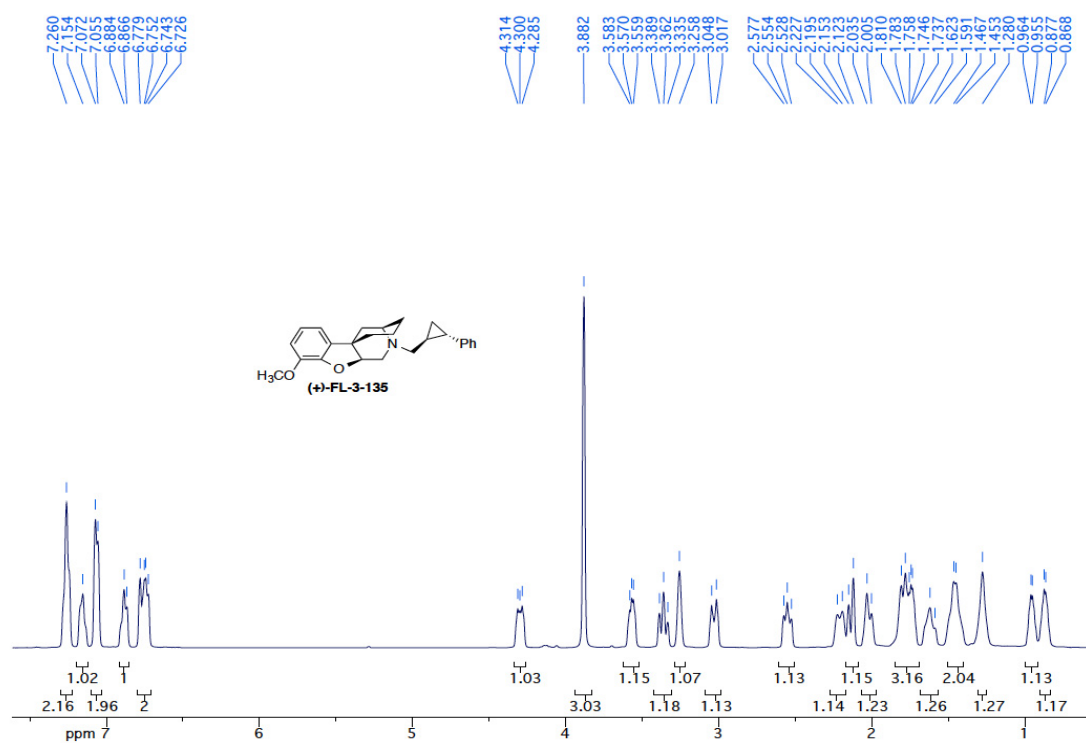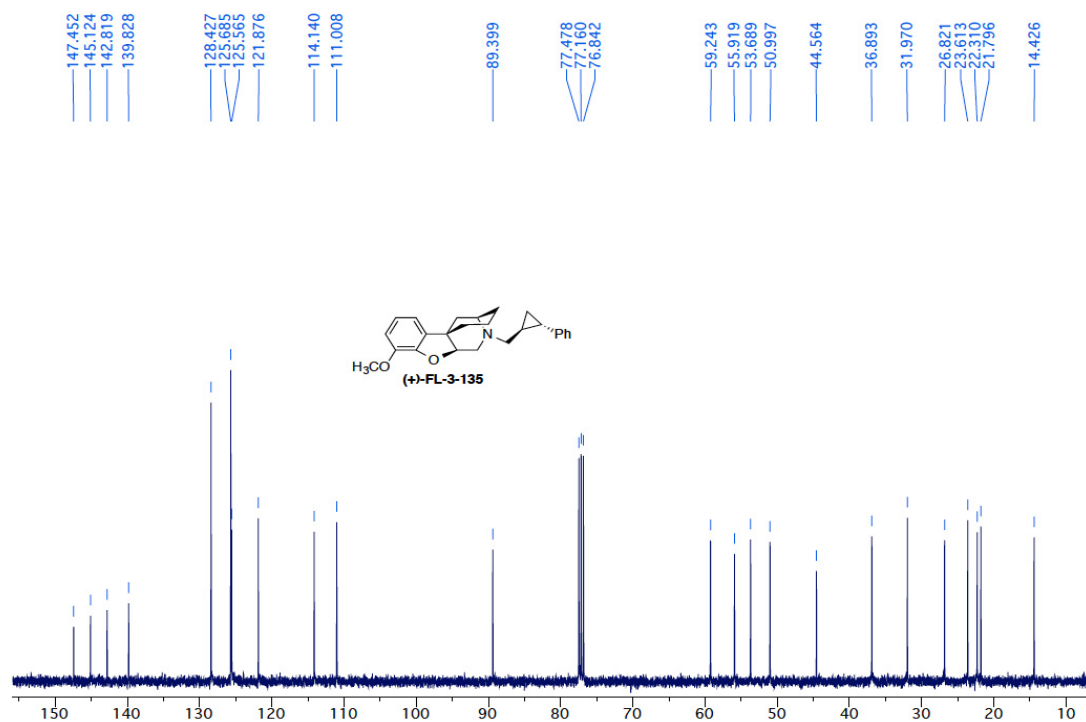

# Compound (-)-12

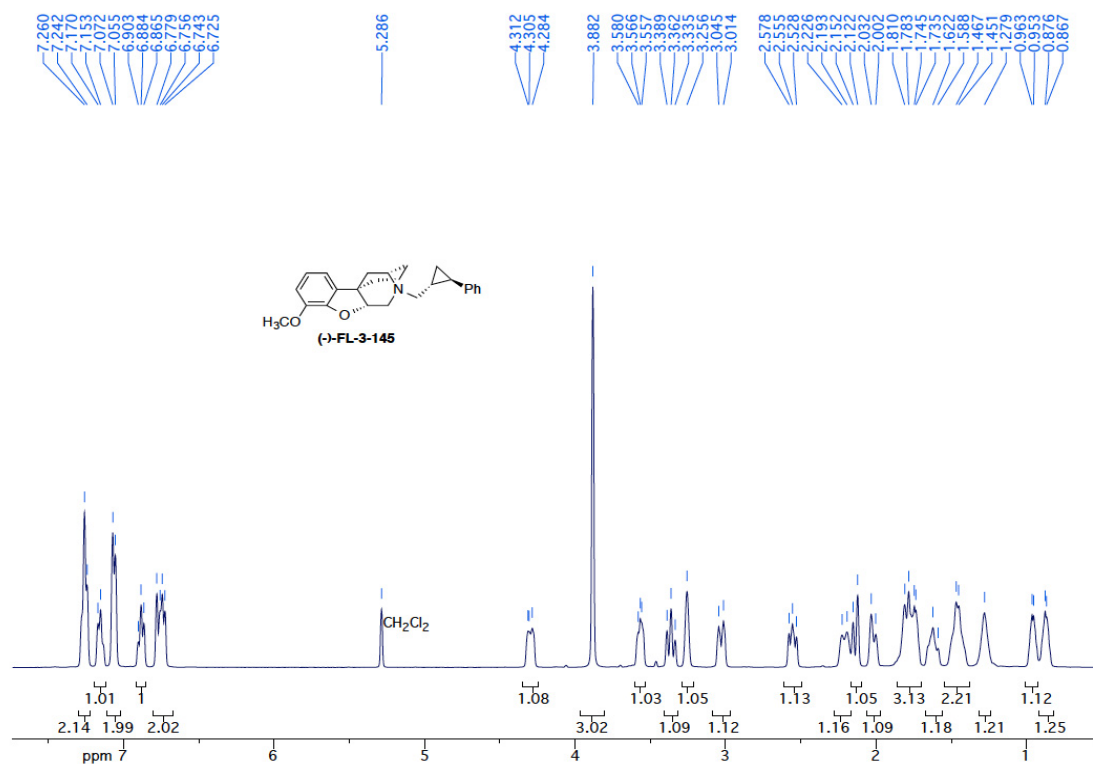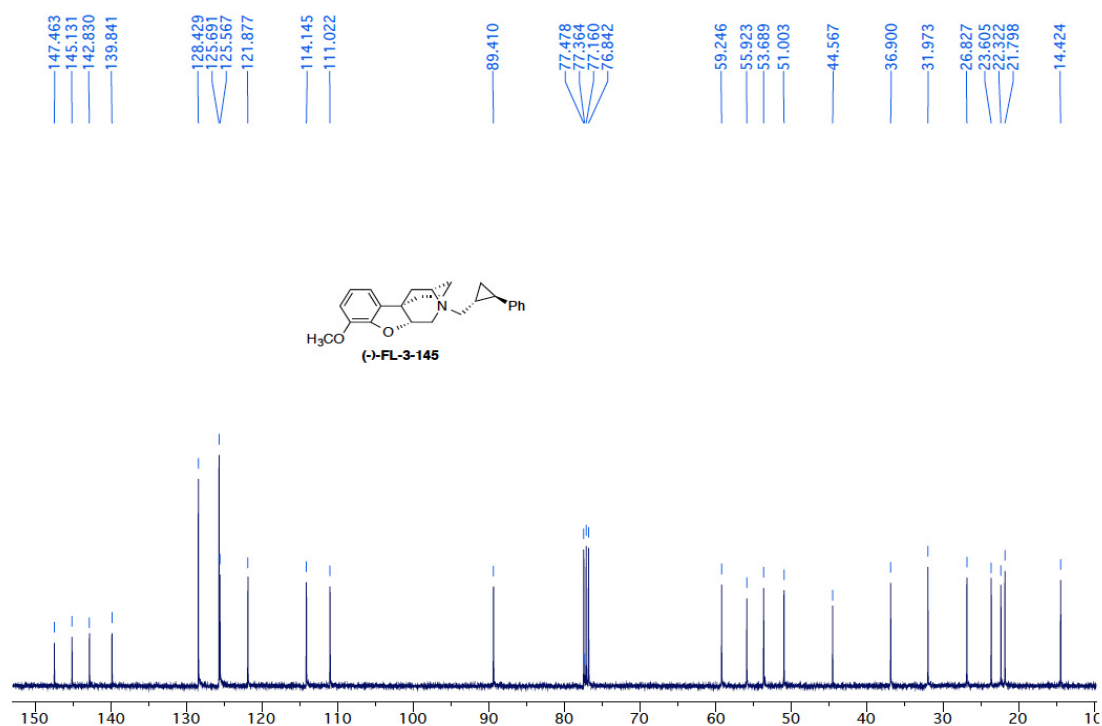

# Compound (+)-13

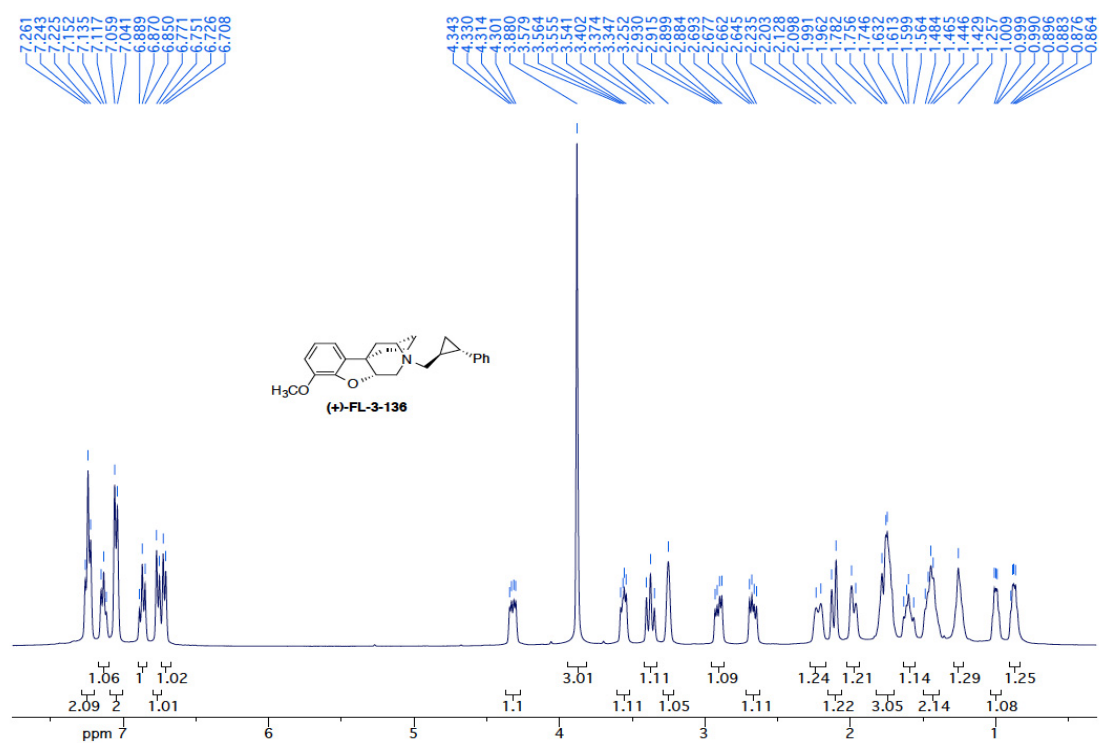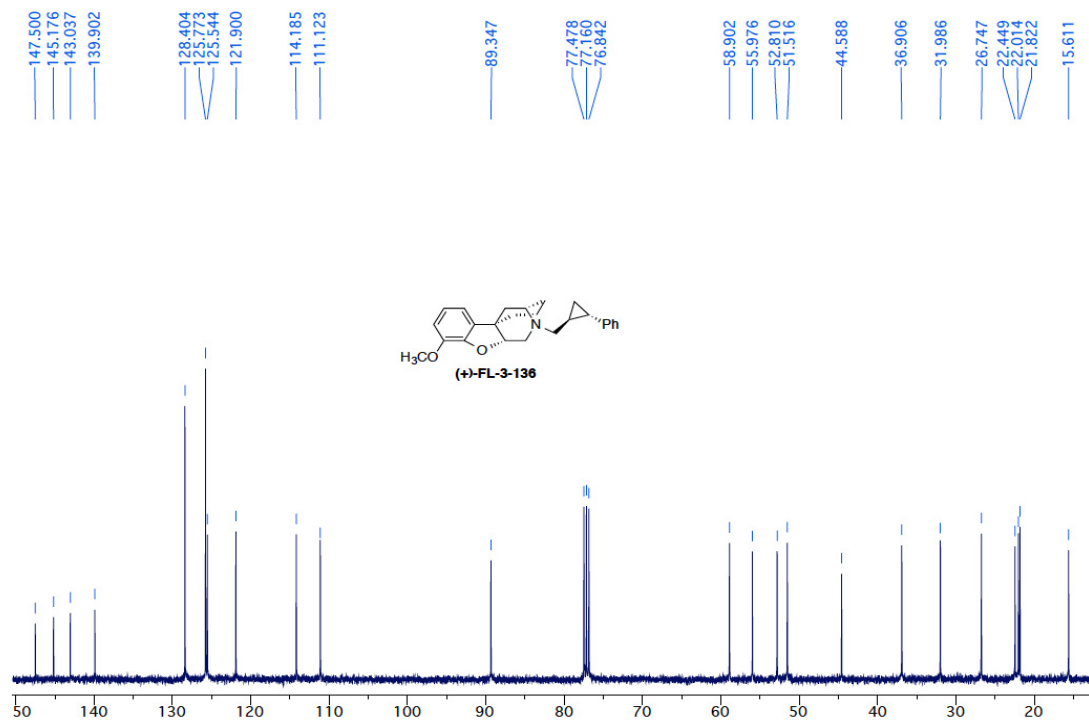

# Compound (-)-13

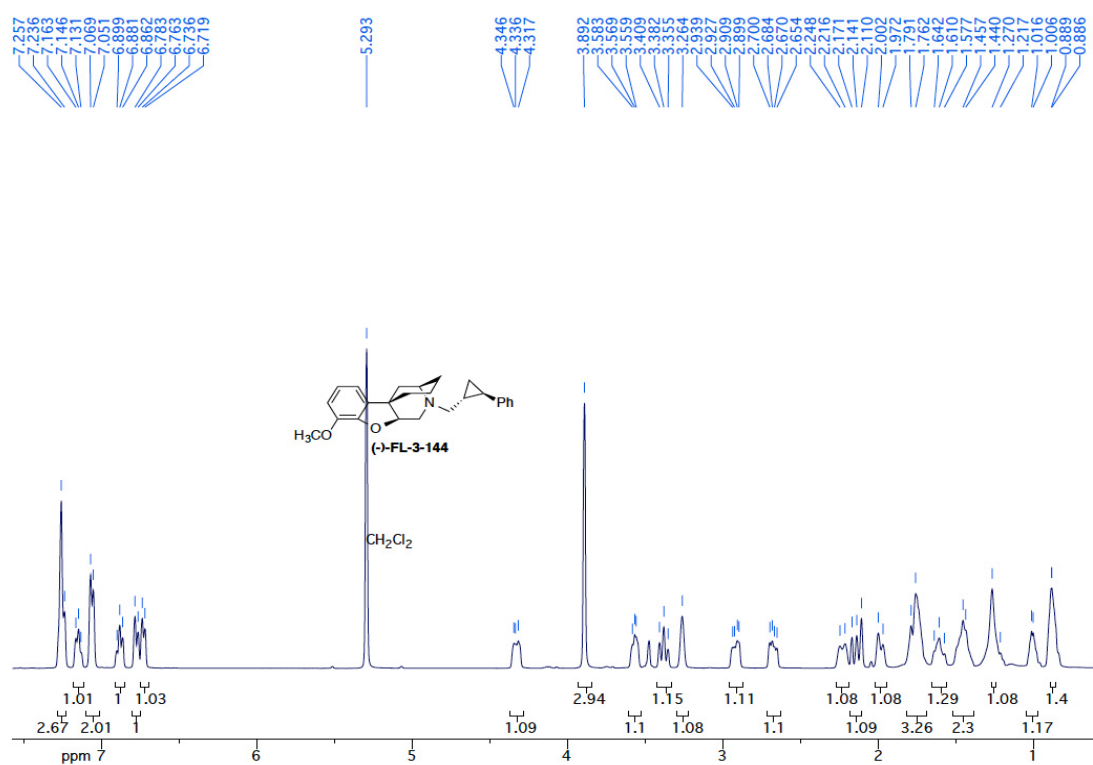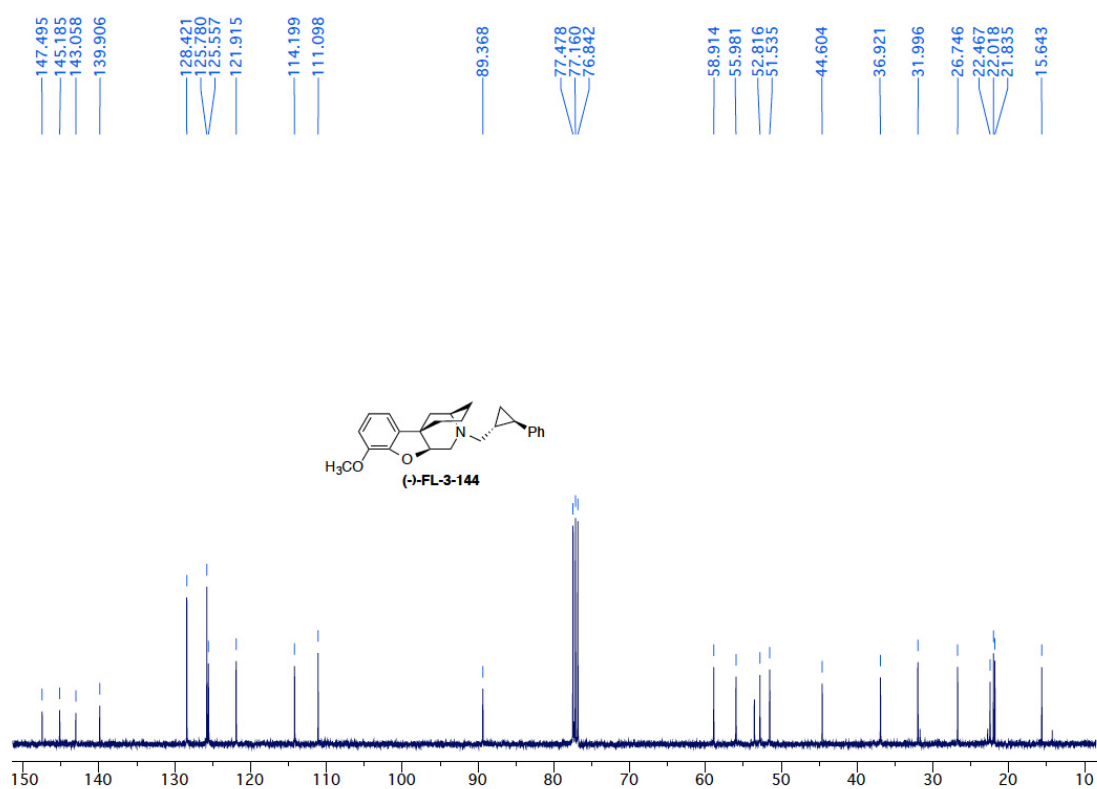

# Compound (+)-16

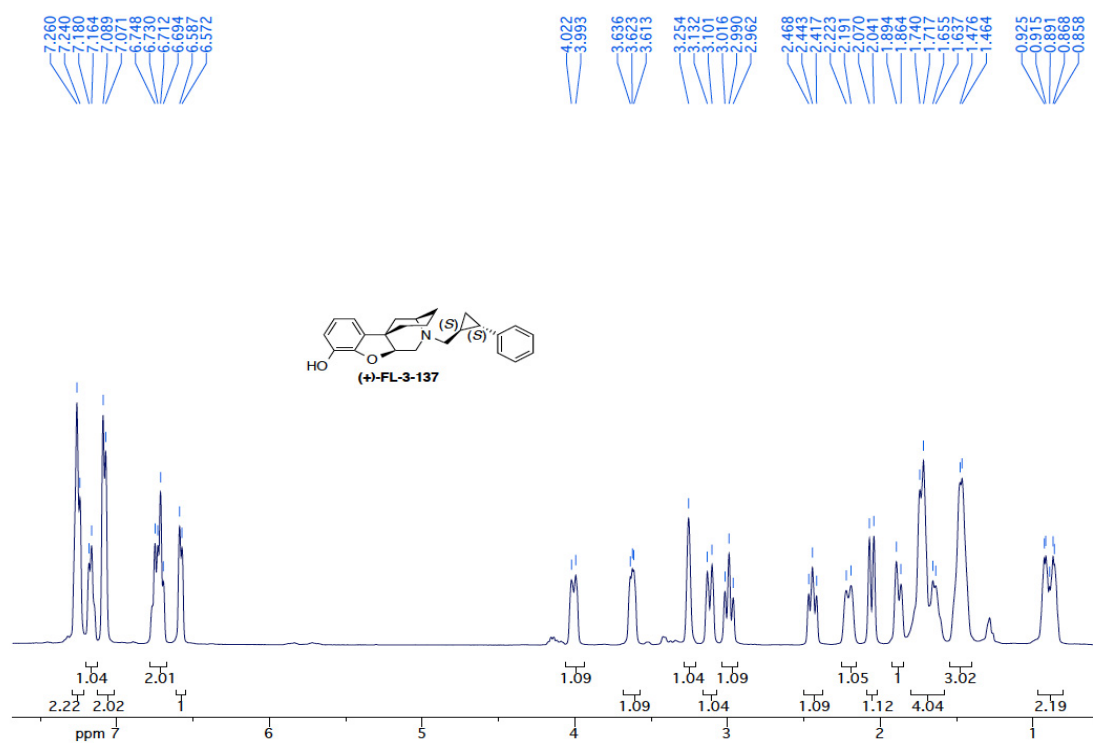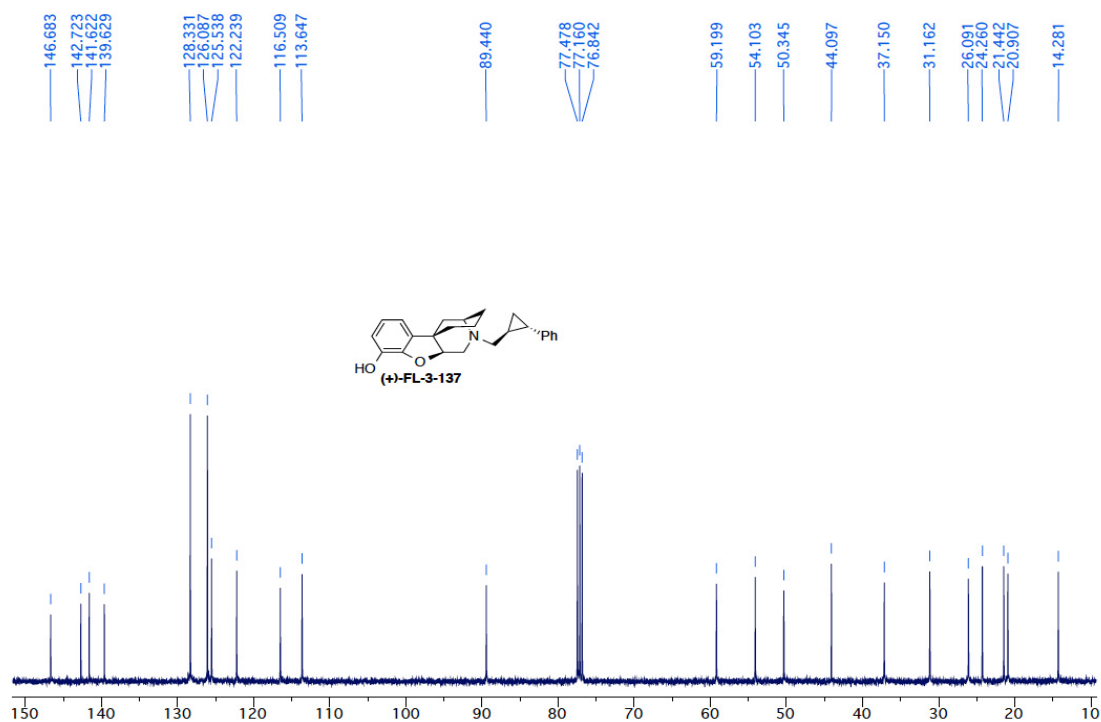

# Compound (-)-16

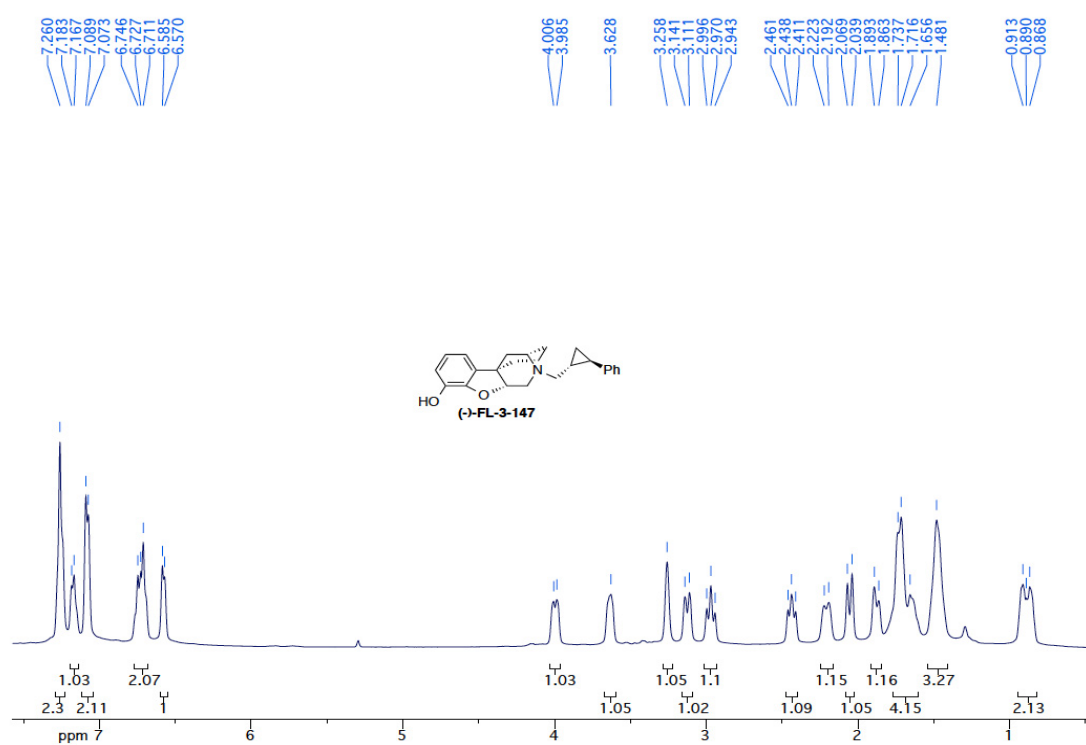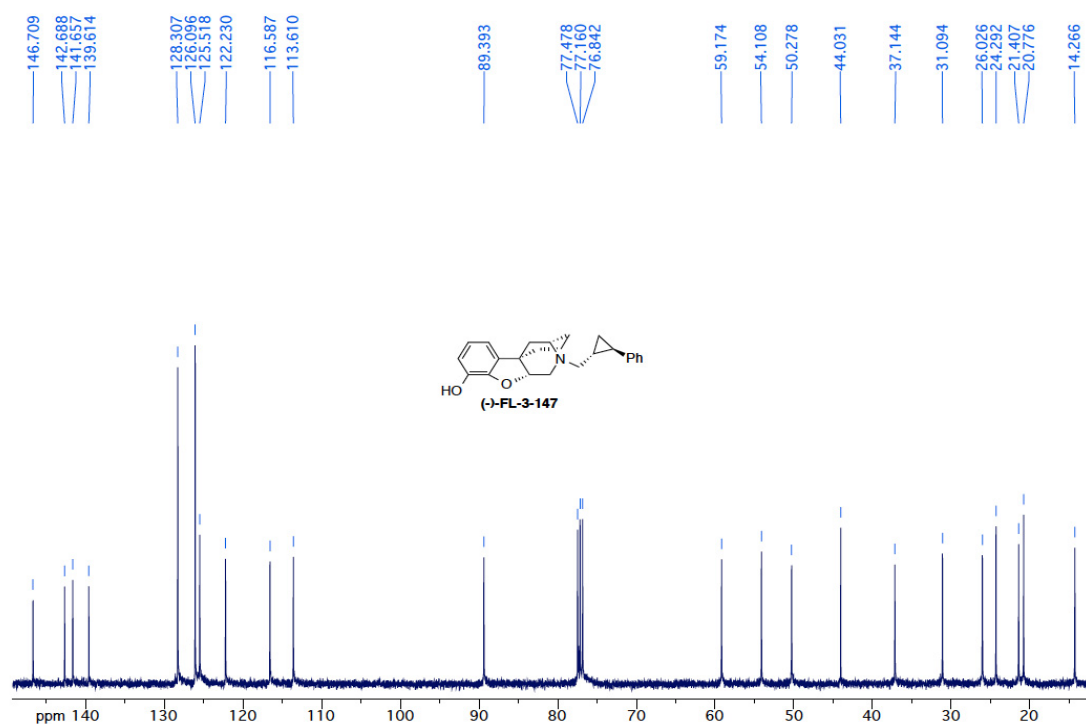

# Compound (+)-17

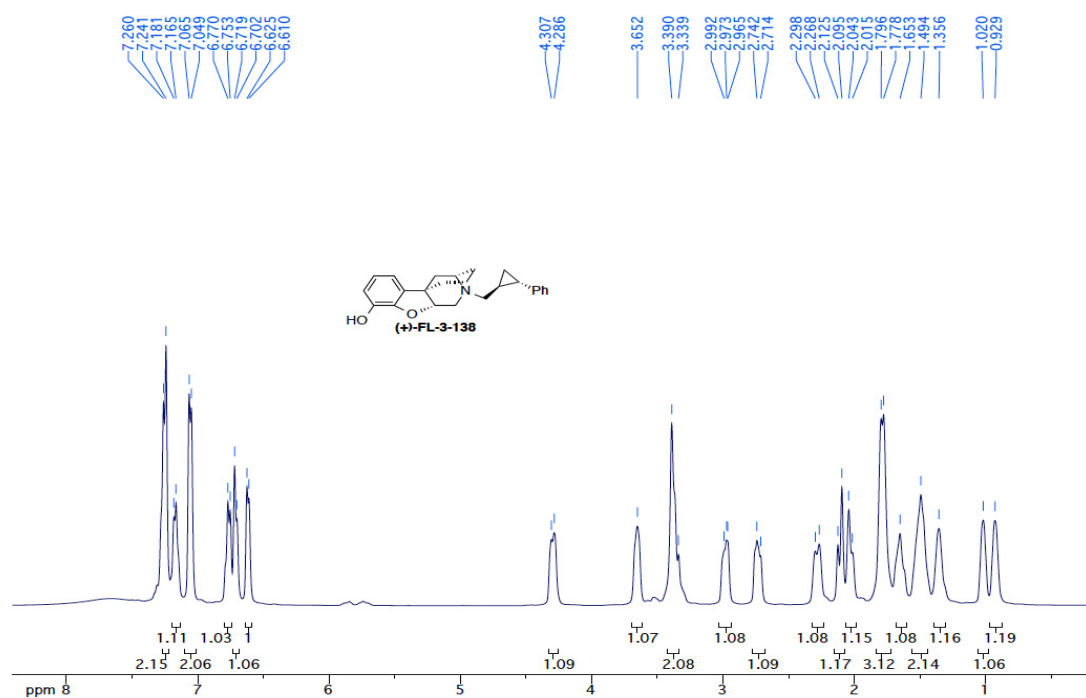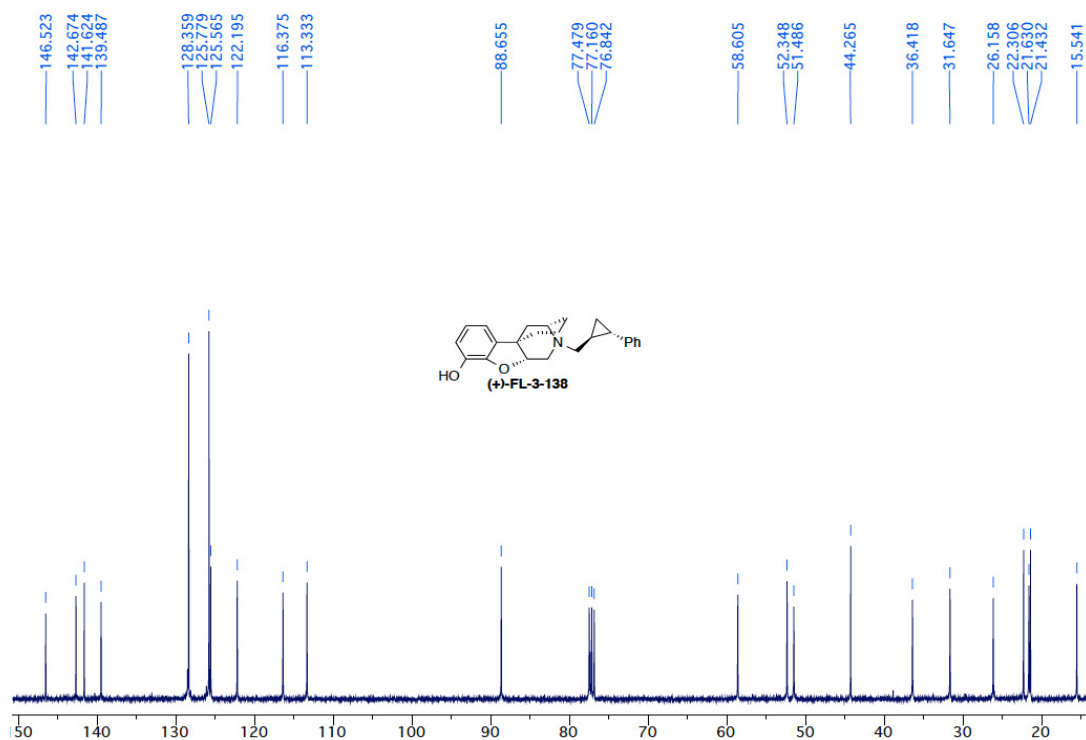



# Compound (-)-17

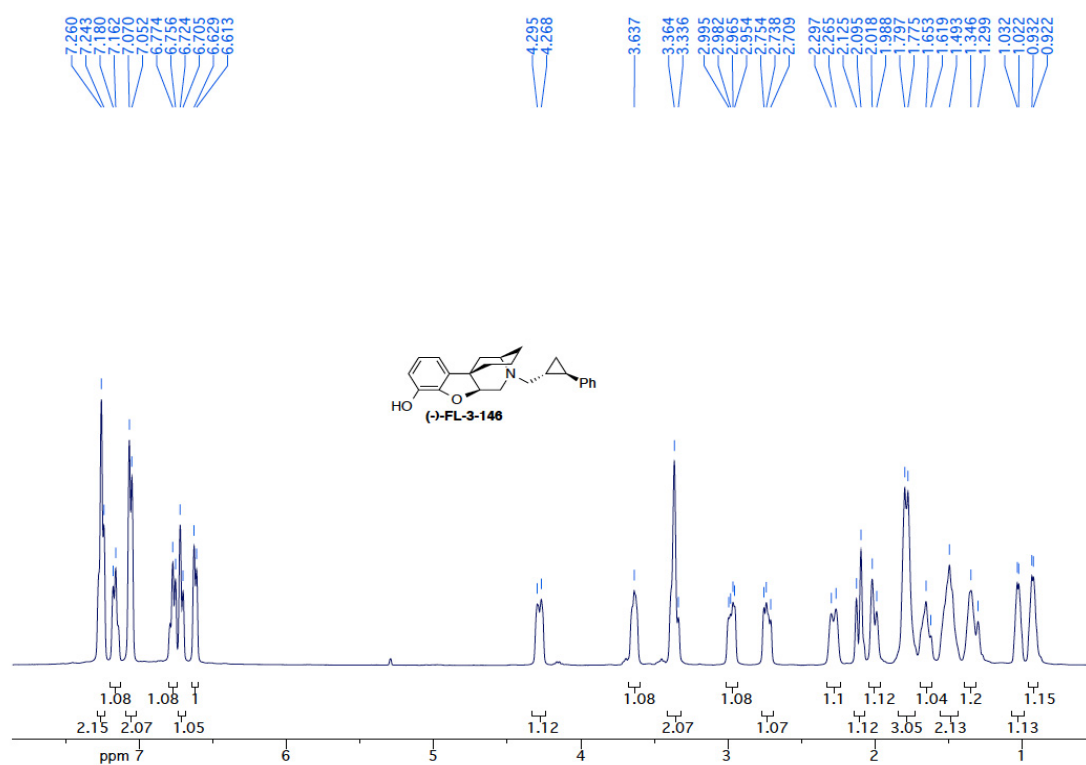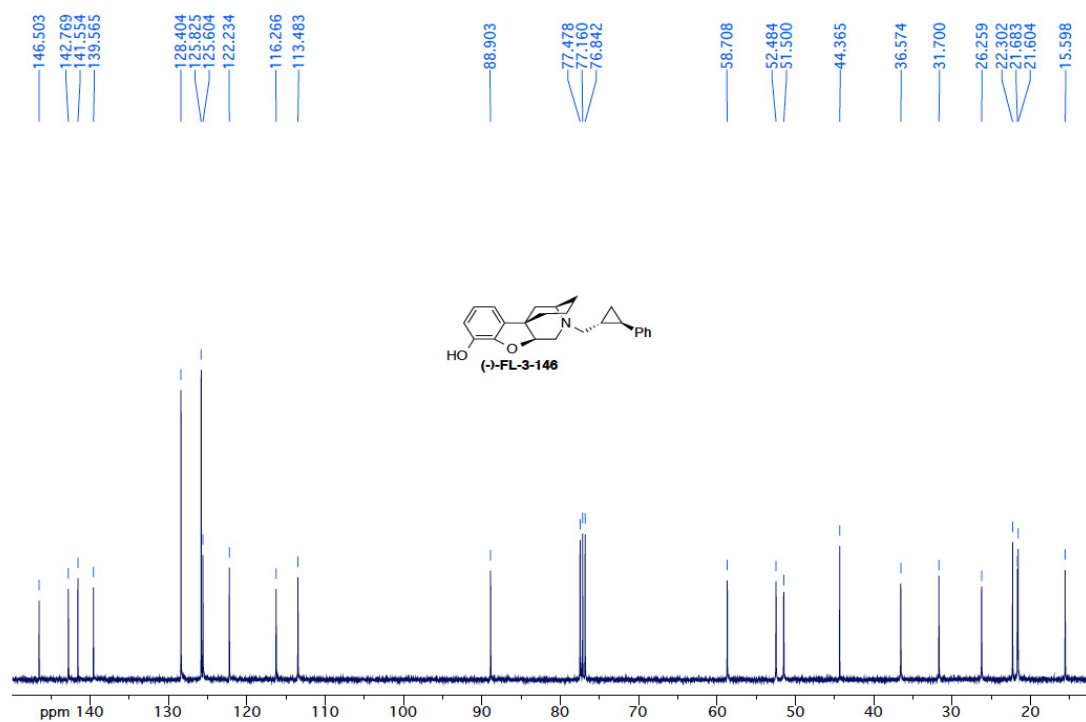

**Table S1.** Crystal data and structure refinement for (-)-6

|                                   |                                                   |          |
|-----------------------------------|---------------------------------------------------|----------|
| Identification code               | knih103                                           |          |
| Empirical formula                 | C <sub>24</sub> H <sub>31</sub> NO <sub>6</sub>   |          |
| Formula weight                    | 429.50                                            |          |
| Temperature                       | 293(2) K                                          |          |
| Wavelength                        | 1.54178 Å                                         |          |
| Crystal system                    | Orthorhombic                                      |          |
| Space group                       | P2 <sub>1</sub> 2 <sub>1</sub> 2 <sub>1</sub>     |          |
| Unit cell dimensions              | a = 6.7324(6) Å                                   | ∠ = 90°. |
|                                   | b = 9.4370(6) Å                                   | ∠ = 90°. |
|                                   | c = 34.612(4) Å                                   | ∠ = 90°. |
| Volume                            | 2199.0(3) Å <sup>3</sup>                          |          |
| Z                                 | 4                                                 |          |
| Density (20°C)                    | 1.297 Mg/m <sup>3</sup>                           |          |
| Absorption coefficient            | 0.759 mm <sup>-1</sup>                            |          |
| F(000)                            | 920                                               |          |
| Crystal size                      | 0.211 x 0.102 x 0.040 mm <sup>3</sup>             |          |
| Theta range for data collection   | 2.553 to 74.508°.                                 |          |
| Index ranges                      | -6 ≤ h ≤ 8, -11 ≤ k ≤ 10, -40 ≤ l ≤ 42            |          |
| Reflections collected             | 16601                                             |          |
| Independent reflections           | 4436 [R <sub>int</sub> = 0.0558]                  |          |
| Completeness to theta = 25.000°   | 98.8 %                                            |          |
| Absorption correction             | Semi-empirical from equivalents                   |          |
| Max. and min. transmission        | 0.7538 and 0.5283                                 |          |
| Refinement method                 | Full-matrix least-squares on F <sup>2</sup>       |          |
| Data / restraints / parameters    | 4436 / 3 / 291                                    |          |
| Goodness-of-fit on F <sup>2</sup> | 1.091                                             |          |
| Final R indices [I > 2σ(I)]       | R <sub>1</sub> = 0.0466, wR <sub>2</sub> = 0.1120 |          |
| R indices (all data)              | R <sub>1</sub> = 0.0480, wR <sub>2</sub> = 0.1137 |          |
| Absolute structure parameter      | 0.10(8)                                           |          |
| Largest diff. peak and hole       | 0.298 and -0.388 e.Å <sup>-3</sup>                |          |

**Table S2.** Atomic coordinates ( $\times 10^4$ ) and equivalent isotropic displacement parameters ( $\text{\AA}^2 \times 10^3$ ) for (-)-**6**. U(eq) is defined as one third of the trace of the orthogonalized  $U_{ij}$  tensor.

|        | x        | y       | z       | U(eq) |
|--------|----------|---------|---------|-------|
| C(1)   | 3200(3)  | 4745(2) | 3486(1) | 35(1) |
| N(2)   | 3254(3)  | 5165(2) | 3067(1) | 35(1) |
| C(3)   | 3074(3)  | 6735(2) | 2972(1) | 38(1) |
| C(3A)  | 4569(3)  | 7609(2) | 3206(1) | 37(1) |
| C(4)   | 966(4)   | 7266(3) | 3039(1) | 48(1) |
| C(5)   | 362(3)   | 7318(3) | 3464(1) | 49(1) |
| C(6)   | 2024(3)  | 7758(2) | 3739(1) | 38(1) |
| C(6A)  | 4167(3)  | 7304(2) | 3631(1) | 29(1) |
| C(6B)  | 5542(3)  | 7847(2) | 3946(1) | 32(1) |
| C(7)   | 6423(3)  | 9149(2) | 4017(1) | 41(1) |
| C(8)   | 7506(4)  | 9301(3) | 4354(1) | 48(1) |
| C(9)   | 7648(3)  | 8205(3) | 4623(1) | 46(1) |
| C(10)  | 6713(3)  | 6909(2) | 4559(1) | 36(1) |
| O(10)  | 6645(3)  | 5783(2) | 4807(1) | 46(1) |
| C(10A) | 7629(5)  | 5932(4) | 5167(1) | 70(1) |
| C(11)  | 5708(3)  | 6754(2) | 4211(1) | 31(1) |
| O(11)  | 4768(2)  | 5518(2) | 4097(1) | 35(1) |
| C(11A) | 4616(3)  | 5733(2) | 3685(1) | 29(1) |
| C(1')  | -1562(3) | 3347(2) | 2951(1) | 31(1) |
| O(1')  | 200(2)   | 3430(2) | 2839(1) | 39(1) |
| O(1'') | -2911(3) | 4195(2) | 2871(1) | 47(1) |
| C(2')  | -2045(3) | 2040(2) | 3210(1) | 37(1) |
| O(2')  | -4099(3) | 1862(2) | 3280(1) | 49(1) |
| C(3')  | -991(3)  | 2215(2) | 3594(1) | 34(1) |
| C(4')  | 886(3)   | 1654(2) | 3659(1) | 39(1) |
| C(5')  | 1885(4)  | 1908(2) | 4002(1) | 44(1) |
| C(6')  | 1054(4)  | 2736(3) | 4291(1) | 45(1) |
| C(7')  | -850(4)  | 3260(3) | 4230(1) | 47(1) |
| C(8')  | -1859(4) | 3002(2) | 3889(1) | 42(1) |
| C(9')  | 2176(6)  | 3086(4) | 4655(1) | 71(1) |
| O(1S)  | 3135(3)  | 1293(3) | 2704(1) | 62(1) |

**Table S3.** Bond lengths [Å] and angles [°] for (-)-6

|                  |            |                   |            |
|------------------|------------|-------------------|------------|
| C(1)-C(11A)      | 1.501(3)   | C(1)-N(2)         | 1.507(3)   |
| C(1)-H(1A)       | 0.9700     | C(1)-H(1B)        | 0.9700     |
| N(2)-C(3)        | 1.522(3)   | N(2)-H(2A)        | 0.8900     |
| N(2)-H(2B)       | 0.8900     | C(3)-C(4)         | 1.523(3)   |
| C(3)-C(3A)       | 1.533(3)   | C(3)-H(3)         | 0.9800     |
| C(3A)-C(6A)      | 1.523(3)   | C(3A)-H(3A)       | 0.9700     |
| C(3A)-H(3B)      | 0.9700     | C(4)-C(5)         | 1.526(4)   |
| C(4)-H(4A)       | 0.9700     | C(4)-H(4B)        | 0.9700     |
| C(5)-C(6)        | 1.528(3)   | C(5)-H(5A)        | 0.9700     |
| C(5)-H(5B)       | 0.9700     | C(6)-C(6A)        | 1.551(3)   |
| C(6)-H(6A)       | 0.9700     | C(6)-H(6B)        | 0.9700     |
| C(6A)-C(6B)      | 1.518(3)   | C(6A)-C(11A)      | 1.525(3)   |
| C(6B)-C(7)       | 1.386(3)   | C(6B)-C(11)       | 1.386(3)   |
| C(7)-C(8)        | 1.385(4)   | C(7)-H(7)         | 0.9300     |
| C(8)-C(9)        | 1.395(4)   | C(8)-H(8)         | 0.9300     |
| C(9)-C(10)       | 1.393(3)   | C(9)-H(9)         | 0.9300     |
| C(10)-O(10)      | 1.367(3)   | C(10)-C(11)       | 1.390(3)   |
| O(10)-C(10A)     | 1.419(3)   | C(10A)-H(10A)     | 0.9600     |
| C(10A)-H(10B)    | 0.9600     | C(10A)-H(10C)     | 0.9600     |
| C(11)-O(11)      | 1.384(2)   | O(11)-C(11A)      | 1.443(2)   |
| C(11A)-H(11A)    | 0.9800     | C(1')-O(1'')      | 1.242(3)   |
| C(1')-O(1')      | 1.251(3)   | C(1')-C(2')       | 1.558(3)   |
| C(2')-O(2')      | 1.414(3)   | C(2')-C(3')       | 1.517(3)   |
| C(2')-H(2')      | 0.9800     | O(2')-H(2C)       | 0.85(4)    |
| C(3')-C(4')      | 1.388(3)   | C(3')-C(8')       | 1.392(3)   |
| C(4')-C(5')      | 1.386(3)   | C(4')-H(4')       | 0.9300     |
| C(5')-C(6')      | 1.387(4)   | C(5')-H(5')       | 0.9300     |
| C(6')-C(7')      | 1.390(4)   | C(6')-C(9')       | 1.508(4)   |
| C(7')-C(8')      | 1.383(4)   | C(7')-H(7')       | 0.9300     |
| C(8')-H(8')      | 0.9300     | C(9')-H(9D)       | 0.9600     |
| C(9')-H(9E)      | 0.9600     | C(9')-H(9F)       | 0.9600     |
| O(1S)-H(1S)      | 0.8199(14) | O(1S)-H(2S)       | 0.8201(14) |
| C(11A)-C(1)-N(2) | 105.32(17) | C(11A)-C(1)-H(1A) | 110.7      |
| N(2)-C(1)-H(1A)  | 110.7      | C(11A)-C(1)-H(1B) | 110.7      |
| N(2)-C(1)-H(1B)  | 110.7      | H(1A)-C(1)-H(1B)  | 108.8      |
| C(1)-N(2)-C(3)   | 117.49(16) | C(1)-N(2)-H(2A)   | 107.9      |
| C(3)-N(2)-H(2A)  | 107.9      | C(1)-N(2)-H(2B)   | 107.9      |
| C(3)-N(2)-H(2B)  | 107.9      | H(2A)-N(2)-H(2B)  | 107.2      |
| N(2)-C(3)-C(4)   | 111.2(2)   | N(2)-C(3)-C(3A)   | 110.98(17) |
| C(4)-C(3)-C(3A)  | 110.75(19) | N(2)-C(3)-H(3)    | 107.9      |
| C(4)-C(3)-H(3)   | 107.9      | C(3A)-C(3)-H(3)   | 107.9      |
| C(6A)-C(3A)-C(3) | 106.95(17) | C(6A)-C(3A)-H(3A) | 110.3      |
| C(3)-C(3A)-H(3A) | 110.3      | C(6A)-C(3A)-H(3B) | 110.3      |

**Table S3.** (continued).

|                      |            |                      |            |
|----------------------|------------|----------------------|------------|
| C(3)-C(3A)-H(3B)     | 110.3      | H(3A)-C(3A)-H(3B)    | 108.6      |
| C(3)-C(4)-C(5)       | 113.90(19) | C(3)-C(4)-H(4A)      | 108.8      |
| C(5)-C(4)-H(4A)      | 108.8      | C(3)-C(4)-H(4B)      | 108.8      |
| C(5)-C(4)-H(4B)      | 108.8      | H(4A)-C(4)-H(4B)     | 107.7      |
| C(4)-C(5)-C(6)       | 114.5(2)   | C(4)-C(5)-H(5A)      | 108.6      |
| C(6)-C(5)-H(5A)      | 108.6      | C(4)-C(5)-H(5B)      | 108.6      |
| C(6)-C(5)-H(5B)      | 108.6      | H(5A)-C(5)-H(5B)     | 107.6      |
| C(5)-C(6)-C(6A)      | 117.08(18) | C(5)-C(6)-H(6A)      | 108.0      |
| C(6A)-C(6)-H(6A)     | 108.0      | C(5)-C(6)-H(6B)      | 108.0      |
| C(6A)-C(6)-H(6B)     | 108.0      | H(6A)-C(6)-H(6B)     | 107.3      |
| C(6B)-C(6A)-C(3A)    | 121.34(17) | C(6B)-C(6A)-C(11A)   | 96.83(15)  |
| C(3A)-C(6A)-C(11A)   | 105.57(17) | C(6B)-C(6A)-C(6)     | 107.49(16) |
| C(3A)-C(6A)-C(6)     | 110.25(17) | C(11A)-C(6A)-C(6)    | 115.05(17) |
| C(7)-C(6B)-C(11)     | 120.5(2)   | C(7)-C(6B)-C(6A)     | 133.5(2)   |
| C(11)-C(6B)-C(6A)    | 105.86(17) | C(8)-C(7)-C(6B)      | 117.9(2)   |
| C(8)-C(7)-H(7)       | 121.1      | C(6B)-C(7)-H(7)      | 121.1      |
| C(7)-C(8)-C(9)       | 121.5(2)   | C(7)-C(8)-H(8)       | 119.3      |
| C(9)-C(8)-H(8)       | 119.3      | C(10)-C(9)-C(8)      | 120.9(2)   |
| C(10)-C(9)-H(9)      | 119.5      | C(8)-C(9)-H(9)       | 119.5      |
| O(10)-C(10)-C(11)    | 116.51(18) | O(10)-C(10)-C(9)     | 126.7(2)   |
| C(11)-C(10)-C(9)     | 116.8(2)   | C(10)-O(10)-C(10A)   | 117.3(2)   |
| O(10)-C(10A)-H(10A)  | 109.5      | O(10)-C(10A)-H(10B)  | 109.5      |
| H(10A)-C(10A)-H(10B) | 109.5      | O(10)-C(10A)-H(10C)  | 109.5      |
| H(10A)-C(10A)-H(10C) | 109.5      | H(10B)-C(10A)-H(10C) |            |
| O(11)-C(11)-C(6B)    | 113.68(17) | O(11)-C(11)-C(10)    | 123.91(18) |
| C(6B)-C(11)-C(10)    | 122.40(19) | C(11)-O(11)-C(11A)   | 101.25(15) |
| O(11)-C(11A)-C(1)    | 114.29(16) | O(11)-C(11A)-C(6A)   | 105.82(15) |
| C(1)-C(11A)-C(6A)    | 114.90(17) | O(11)-C(11A)-H(11A)  | 107.1      |
| C(1)-C(11A)-H(11A)   | 107.1      | C(6A)-C(11A)-H(11A)  | 107.1      |
| O(1'')-C(1')-O(1')   | 125.7(2)   | O(1'')-C(1')-C(2')   | 119.09(18) |
| O(1')-C(1')-C(2')    | 115.23(19) | O(2')-C(2')-C(3')    | 108.64(19) |
| O(2')-C(2')-C(1')    | 113.41(18) | C(3')-C(2')-C(1')    | 108.72(16) |
| O(2')-C(2')-H(2')    | 108.7      | C(3')-C(2')-H(2')    | 108.7      |
| C(1')-C(2')-H(2')    | 108.7      | C(2')-O(2')-H(2C)    | 107(3)     |
| C(4')-C(3')-C(8')    | 117.9(2)   | C(4')-C(3')-C(2')    | 121.7(2)   |
| C(8')-C(3')-C(2')    | 120.4(2)   | C(5')-C(4')-C(3')    | 120.9(2)   |
| C(5')-C(4')-H(4')    | 119.5      | C(3')-C(4')-H(4')    | 119.5      |
| C(4')-C(5')-C(6')    | 121.3(2)   | C(4')-C(5')-H(5')    | 119.4      |
| C(6')-C(5')-H(5')    | 119.4      | C(5')-C(6')-C(7')    | 117.7(2)   |
| C(5')-C(6')-C(9')    | 121.7(3)   | C(7')-C(6')-C(9')    | 120.6(3)   |
| C(8')-C(7')-C(6')    | 121.2(2)   | C(8')-C(7')-H(7')    | 119.4      |
| C(6')-C(7')-H(7')    | 119.4      | C(7')-C(8')-C(3')    | 120.9(2)   |
| C(7')-C(8')-H(8')    | 119.5      | C(3')-C(8')-H(8')    | 119.5      |

**Table S3.** (continued).

---

|                   |          |                   |       |
|-------------------|----------|-------------------|-------|
| C(6')-C(9')-H(9D) | 109.5    | C(6')-C(9')-H(9E) | 109.5 |
| H(9D)-C(9')-H(9E) | 109.5    | C(6')-C(9')-H(9F) | 109.5 |
| H(9D)-C(9')-H(9F) | 109.5    | H(9E)-C(9')-H(9F) | 109.5 |
| H(1S)-O(1S)-H(2S) | 104.5(2) |                   |       |

---

**Table S4.** Anisotropic displacement parameters ( $\text{\AA}^2 \times 10^3$ ) for **(-)-6**. The anisotropic displacement factor exponent takes the form:  $-2 \pi^2 [h^2 a^{*2} U^{11} + \dots + 2 h k a^* b^* U^{12}]$

|        | U <sup>11</sup> | U <sup>22</sup> | U <sup>33</sup> | U <sup>23</sup> | U <sup>13</sup> | U <sup>12</sup> |
|--------|-----------------|-----------------|-----------------|-----------------|-----------------|-----------------|
| C(1)   | 38(1)           | 32(1)           | 37(1)           | -1(1)           | -6(1)           | -4(1)           |
| N(2)   | 29(1)           | 43(1)           | 34(1)           | -7(1)           | -1(1)           | -1(1)           |
| C(3)   | 39(1)           | 45(1)           | 31(1)           | 5(1)            | 0(1)            | -1(1)           |
| C(3A)  | 39(1)           | 37(1)           | 36(1)           | 7(1)            | 4(1)            | -4(1)           |
| C(4)   | 43(1)           | 56(1)           | 45(1)           | 4(1)            | -12(1)          | 11(1)           |
| C(5)   | 31(1)           | 64(2)           | 52(1)           | -3(1)           | -2(1)           | 13(1)           |
| C(6)   | 36(1)           | 38(1)           | 42(1)           | -3(1)           | 2(1)            | 7(1)            |
| C(6A)  | 29(1)           | 26(1)           | 33(1)           | 2(1)            | 1(1)            | -1(1)           |
| C(6B)  | 30(1)           | 29(1)           | 37(1)           | -3(1)           | 2(1)            | -1(1)           |
| C(7)   | 39(1)           | 31(1)           | 52(1)           | -3(1)           | 6(1)            | -7(1)           |
| C(8)   | 41(1)           | 41(1)           | 63(2)           | -13(1)          | 1(1)            | -14(1)          |
| C(9)   | 38(1)           | 51(1)           | 49(1)           | -15(1)          | -6(1)           | -6(1)           |
| C(10)  | 32(1)           | 41(1)           | 35(1)           | -5(1)           | -2(1)           | 1(1)            |
| O(10)  | 53(1)           | 50(1)           | 36(1)           | 1(1)            | -10(1)          | 0(1)            |
| C(10A) | 74(2)           | 82(2)           | 53(2)           | 10(2)           | -28(2)          | -6(2)           |
| C(11)  | 28(1)           | 31(1)           | 35(1)           | -4(1)           | -1(1)           | -2(1)           |
| O(11)  | 43(1)           | 28(1)           | 32(1)           | 2(1)            | -7(1)           | -4(1)           |
| C(11A) | 31(1)           | 26(1)           | 32(1)           | 0(1)            | -1(1)           | 1(1)            |
| C(1')  | 31(1)           | 34(1)           | 29(1)           | -4(1)           | -3(1)           | -2(1)           |
| O(1')  | 34(1)           | 46(1)           | 38(1)           | -4(1)           | 0(1)            | -3(1)           |
| O(1'') | 41(1)           | 49(1)           | 51(1)           | 15(1)           | 7(1)            | 10(1)           |
| C(2')  | 40(1)           | 32(1)           | 39(1)           | -1(1)           | -4(1)           | -3(1)           |
| O(2')  | 42(1)           | 60(1)           | 45(1)           | 5(1)            | -7(1)           | -18(1)          |
| C(3')  | 39(1)           | 27(1)           | 37(1)           | 4(1)            | -3(1)           | -1(1)           |
| C(4')  | 40(1)           | 35(1)           | 41(1)           | 5(1)            | 0(1)            | 4(1)            |
| C(5')  | 39(1)           | 44(1)           | 48(1)           | 13(1)           | -6(1)           | 3(1)            |
| C(6')  | 55(1)           | 40(1)           | 39(1)           | 9(1)            | -10(1)          | -7(1)           |
| C(7')  | 61(2)           | 42(1)           | 39(1)           | -3(1)           | -4(1)           | 6(1)            |
| C(8')  | 44(1)           | 39(1)           | 43(1)           | 0(1)            | -4(1)           | 11(1)           |
| C(9')  | 84(2)           | 77(2)           | 50(2)           | 8(1)            | -25(2)          | -15(2)          |
| O(1S)  | 43(1)           | 83(1)           | 62(1)           | -31(1)          | -15(1)          | 14(1)           |

**Table S5.** Hydrogen coordinates ( $\times 10^4$ ) and isotropic displacement parameters ( $\text{\AA}^2 \times 10^3$ ) for (-)-**6**.

|        | x         | y        | z        | U(eq) |
|--------|-----------|----------|----------|-------|
| H(1A)  | 1870      | 4849     | 3590     | 42    |
| H(1B)  | 3619      | 3769     | 3518     | 42    |
| H(2A)  | 2274      | 4712     | 2946     | 42    |
| H(2B)  | 4390      | 4852     | 2967     | 42    |
| H(3)   | 3385      | 6858     | 2697     | 46    |
| H(3A)  | 5917      | 7341     | 3139     | 45    |
| H(3B)  | 4401      | 8611     | 3153     | 45    |
| H(4A)  | 50        | 6653     | 2901     | 57    |
| H(4B)  | 845       | 8209     | 2930     | 57    |
| H(5A)  | -115      | 6388     | 3539     | 58    |
| H(5B)  | -733      | 7978     | 3492     | 58    |
| H(6A)  | 1722      | 7374     | 3992     | 46    |
| H(6B)  | 2001      | 8782     | 3762     | 46    |
| H(7)   | 6291      | 9896     | 3843     | 49    |
| H(8)   | 8153      | 10153    | 4403     | 58    |
| H(9)   | 8376      | 8342     | 4849     | 55    |
| H(10A) | 9034      | 6015     | 5125     | 104   |
| H(10B) | 7367      | 5116     | 5325     | 104   |
| H(10C) | 7154      | 6767     | 5296     | 104   |
| H(11A) | 5936      | 5559     | 3576     | 35    |
| H(2')  | -1538     | 1186     | 3083     | 44    |
| H(2C)  | -4640(60) | 1690(40) | 3062(12) | 74    |
| H(4')  | 1480      | 1100     | 3469     | 46    |
| H(5')  | 3138      | 1516     | 4039     | 52    |
| H(7')  | -1456     | 3795     | 4423     | 57    |
| H(8')  | -3136     | 3359     | 3857     | 50    |
| H(9D)  | 2006      | 4072     | 4715     | 106   |
| H(9E)  | 3562      | 2888     | 4619     | 106   |
| H(9F)  | 1675      | 2522     | 4864     | 106   |
| H(1S)  | 2710(50)  | 650(20)  | 2569(9)  | 94    |
| H(2S)  | 2220(30)  | 1860(20) | 2717(12) | 94    |



**Table S6.** Torsion angles [°] for (-)-6.

|                          |             |                          |             |
|--------------------------|-------------|--------------------------|-------------|
| C(11A)-C(1)-N(2)-C(3)    | -47.6(2)    | C(1)-N(2)-C(3)-C(4)      | -72.5(2)    |
| C(1)-N(2)-C(3)-C(3A)     | 51.3(3)     | N(2)-C(3)-C(3A)-C(6A)    | -57.3(2)    |
| C(4)-C(3)-C(3A)-C(6A)    | 66.7(2)     | N(2)-C(3)-C(4)-C(5)      | 69.3(3)     |
| C(3A)-C(3)-C(4)-C(5)     | -54.6(3)    | C(3)-C(4)-C(5)-C(6)      | 36.8(3)     |
| C(4)-C(5)-C(6)-C(6A)     | -33.1(3)    | C(3)-C(3A)-C(6A)-C(6B)   | 172.16(18)  |
| C(3)-C(3A)-C(6A)-C(11A)  | 63.9(2)     | C(3)-C(3A)-C(6A)-C(6)    | -61.0(2)    |
| C(5)-C(6)-C(6A)-C(6B)    | -179.6(2)   | C(5)-C(6)-C(6A)-C(3A)    | 46.1(3)     |
| C(5)-C(6)-C(6A)-C(11A)   | -73.1(3)    | C(3A)-C(6A)-C(6B)-C(7)   | 46.1(3)     |
| C(11A)-C(6A)-C(6B)-C(7)  | 159.0(2)    | C(6)-C(6A)-C(6B)-C(7)    | -82.0(3)    |
| C(3A)-C(6A)-C(6B)-C(11)  | -139.50(19) | C(11A)-C(6A)-C(6B)-C(11) | -26.59(19)  |
| C(6)-C(6A)-C(6B)-C(11)   | 92.42(19)   | C(11)-C(6B)-C(7)-C(8)    | 1.7(3)      |
| C(6A)-C(6B)-C(7)-C(8)    | 175.4(2)    | C(6B)-C(7)-C(8)-C(9)     | -2.6(4)     |
| C(7)-C(8)-C(9)-C(10)     | 0.5(4)      | C(8)-C(9)-C(10)-O(10)    | -176.2(2)   |
| C(8)-C(9)-C(10)-C(11)    | 2.3(3)      | C(11)-C(10)-O(10)-C(10A) | -178.8(2)   |
| C(9)-C(10)-O(10)-C(10A)  | -0.3(4)     | C(7)-C(6B)-C(11)-O(11)   | -179.36(19) |
| C(6A)-C(6B)-C(11)-O(11)  | 5.4(2)      | C(7)-C(6B)-C(11)-C(10)   | 1.3(3)      |
| C(6A)-C(6B)-C(11)-C(10)  | -174.00(19) | O(10)-C(10)-C(11)-O(11)  | -3.9(3)     |
| C(9)-C(10)-C(11)-O(11)   | 177.47(19)  | O(10)-C(10)-C(11)-C(6B)  | 175.42(19)  |
| C(9)-C(10)-C(11)-C(6B)   | -3.2(3)     | C(6B)-C(11)-O(11)-C(11A) | 20.1(2)     |
| C(10)-C(11)-O(11)-C(11A) | -160.52(19) | C(11)-O(11)-C(11A)-C(1)  | -165.13(17) |
| C(11)-O(11)-C(11A)-C(6A) | -37.68(19)  | N(2)-C(1)-C(11A)-O(11)   | 179.24(16)  |
| N(2)-C(1)-C(11A)-C(6A)   | 56.6(2)     | C(6B)-C(6A)-C(11A)-O(11) | 39.56(18)   |
| C(3A)-C(6A)-C(11A)-O(11) | 164.81(16)  | C(6)-C(6A)-C(11A)-O(11)  | -73.4(2)    |
| C(6B)-C(6A)-C(11A)-C(1)  | 166.64(17)  | C(3A)-C(6A)-C(11A)-C(1)  | -68.1(2)    |
| C(6)-C(6A)-C(11A)-C(1)   | 53.7(2)     | O(1'')-C(1')-C(2')-O(2') | 8.8(3)      |
| O(1')-C(1')-C(2')-O(2')  | -170.61(19) | O(1'')-C(1')-C(2')-C(3') | -112.2(2)   |
| O(1')-C(1')-C(2')-C(3')  | 68.4(2)     | O(2')-C(2')-C(3')-C(4')  | 143.6(2)    |
| C(1')-C(2')-C(3')-C(4')  | -92.5(2)    | O(2')-C(2')-C(3')-C(8')  | -39.1(3)    |
| C(1')-C(2')-C(3')-C(8')  | 84.8(2)     | C(8')-C(3')-C(4')-C(5')  | -2.0(3)     |
| C(2')-C(3')-C(4')-C(5')  | 175.4(2)    | C(3')-C(4')-C(5')-C(6')  | -0.4(3)     |
| C(4')-C(5')-C(6')-C(7')  | 2.3(3)      | C(4')-C(5')-C(6')-C(9')  | -176.5(2)   |
| C(5')-C(6')-C(7')-C(8')  | -1.9(4)     | C(9')-C(6')-C(7')-C(8')  | 176.9(3)    |
| C(6')-C(7')-C(8')-C(3')  | -0.5(4)     | C(4')-C(3')-C(8')-C(7')  | 2.4(3)      |
| C(2')-C(3')-C(8')-C(7')  | -175.0(2)   |                          |             |

**Table S7.** Hydrogen bonds for **(-)-6** [Å and °].

| D-H...A                | d(D-H)     | d(H...A)  | d(D...A) | <(DHA) |
|------------------------|------------|-----------|----------|--------|
| C(1)-H(1B)...O(2')#1   | 0.97       | 2.51      | 3.349(3) | 145.4  |
| N(2)-H(2A)...O(1')     | 0.89       | 1.88      | 2.744(2) | 161.8  |
| N(2)-H(2B)...O(1'')#1  | 0.89       | 1.95      | 2.822(2) | 166.8  |
| C(9)-H(9)...O(10)#2    | 0.93       | 2.63      | 3.469(3) | 149.6  |
| O(2')-H(2C)...O(1S)#3  | 0.85(4)    | 1.98(4)   | 2.781(3) | 156(4) |
| O(1S)-H(1S)...O(1'')#4 | 0.8199(14) | 2.052(17) | 2.810(3) | 154(4) |
| O(1S)-H(2S)...O(1')    | 0.8201(14) | 2.053(7)  | 2.862(3) | 169(3) |

Symmetry transformations used to generate equivalent atoms:

#1  $x+1, y, z$  #2  $x+1/2, -y+3/2, -z+1$  #3  $x-1, y, z$

#4  $-x, y-1/2, -z+1/2$
